# Supplementary material for: The physicochemical properties and volatile compounds analysis in watermelon soy sauce, a Chinese traditional fermented condiment
Source: Research Square preprint supplement (doi:10.21203/rs.3.rs-6909727/v1), 2025-06-26
Supplement: Supplementary file 1 [file e47168b85edeb440ba7043a9.docx]

| Serial number | MOS sensors | Performance description |
| --- | --- | --- |
| X1 | W1C | aromatic compounds |
| X2 | W5S | broad range, react on nitrogen oxides |
| X3 | W3C | ammonia, aromatic compounds |
| X4 | W6S | hydrocarbons |
| X5 | W5C | alkanes, aromatic compounds |
| X6 | W1S | methane, broad range of compounds |
| X7 | W1W | sulfur compounds, terpenes |
| X8 | W2S | broad range, alcohols |
| X9 | W2W | sulphur organic compounds |
| X10 | W3S | methane, aliphatic compounds |

Table 1S. Corresponding aroma types of different sensors of E-nose.

Figure 1S. Functional groups of volatile compounds identified in different soy sauce samples.
